# Supplementary material for: Prediction on the light-assisted exfoliation of multilayered arsenene by the photo-isomerization of azobenzene
Source: Royal Society of Chemistry journal article supplement (doi:10.1039/c7nr01667k), 2017-01-01
Supplement: c7nr01667k1.pdf [file c7nr01667k1.pdf]

# Prediction on the Light-Assisted Exfoliation of Multilayered Arsenene by the Photo-Isomerization of Azobenzene

*Jun Zhao,<sup>a,c</sup> Chunyan Liu,<sup>a</sup> Wanlin Guo,<sup>b</sup> Jing Ma<sup>a,\*</sup>*

<sup>a</sup>School of Chemistry and Chemical Engineering, Institute of Theoretical and Computational Chemistry, Key Laboratory of Mesoscopic Chemistry of MOE, Nanjing University, Nanjing 210093, P. R. China

<sup>b</sup>State Key Laboratory of Mechanics and Control of Mechanical Structures, Institute of Nano Science, Nanjing University of Aeronautics and Astronautics, Nanjing 210016, P. R. China

<sup>c</sup>School of Physics and Optoelectronic Engineering, Yangtze University, Jingzhou, Hubei 434023, P. R. China

**Table S1** Force field parameters for C-N=N-C torsion path in the reactive force fields.

| system       |                     | torsion path                               |     |                   |
|--------------|---------------------|--------------------------------------------|-----|-------------------|
|              |                     | $K_{\phi}/\text{kcal}\cdot\text{mol}^{-1}$ | $n$ | $\phi_0/^{\circ}$ |
| Default PCFF |                     | 7.5                                        | 2   | 180               |
| RMD          | <i>cis to trans</i> | 28                                         | 1   | 0                 |
|              | <i>trans to cis</i> | 28                                         | 1   | 180               |

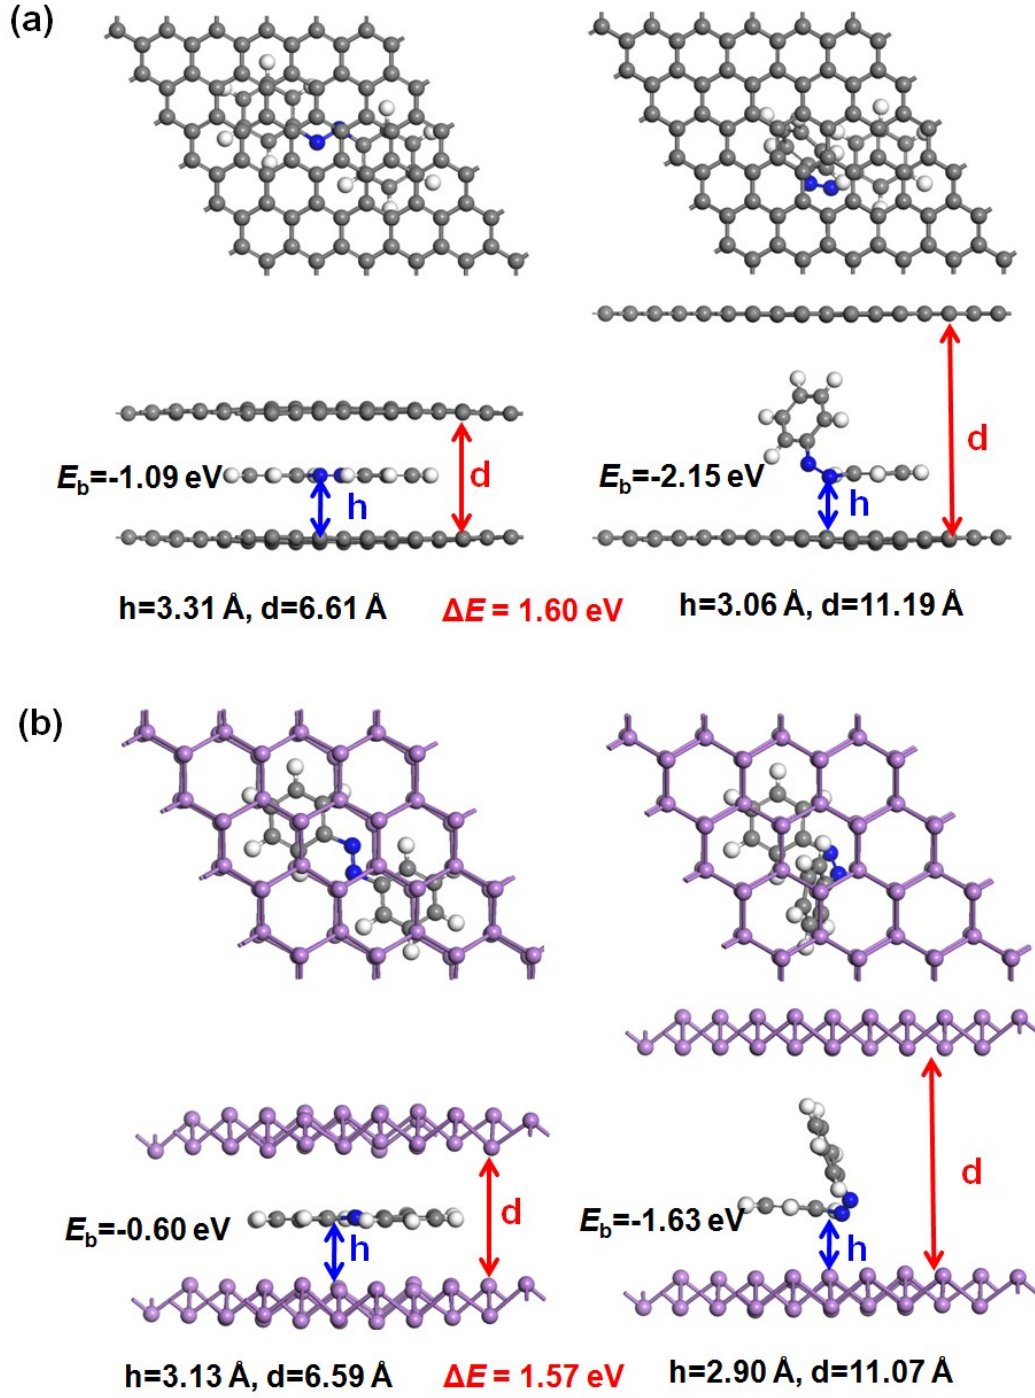

**Fig. S1** The optimized structures of *trans/cis*-AB sandwiched between (a) two graphene monolayers and (b) two arsenene monolayers.  $E_b$  denotes the binding energies of the various hybrid systems.

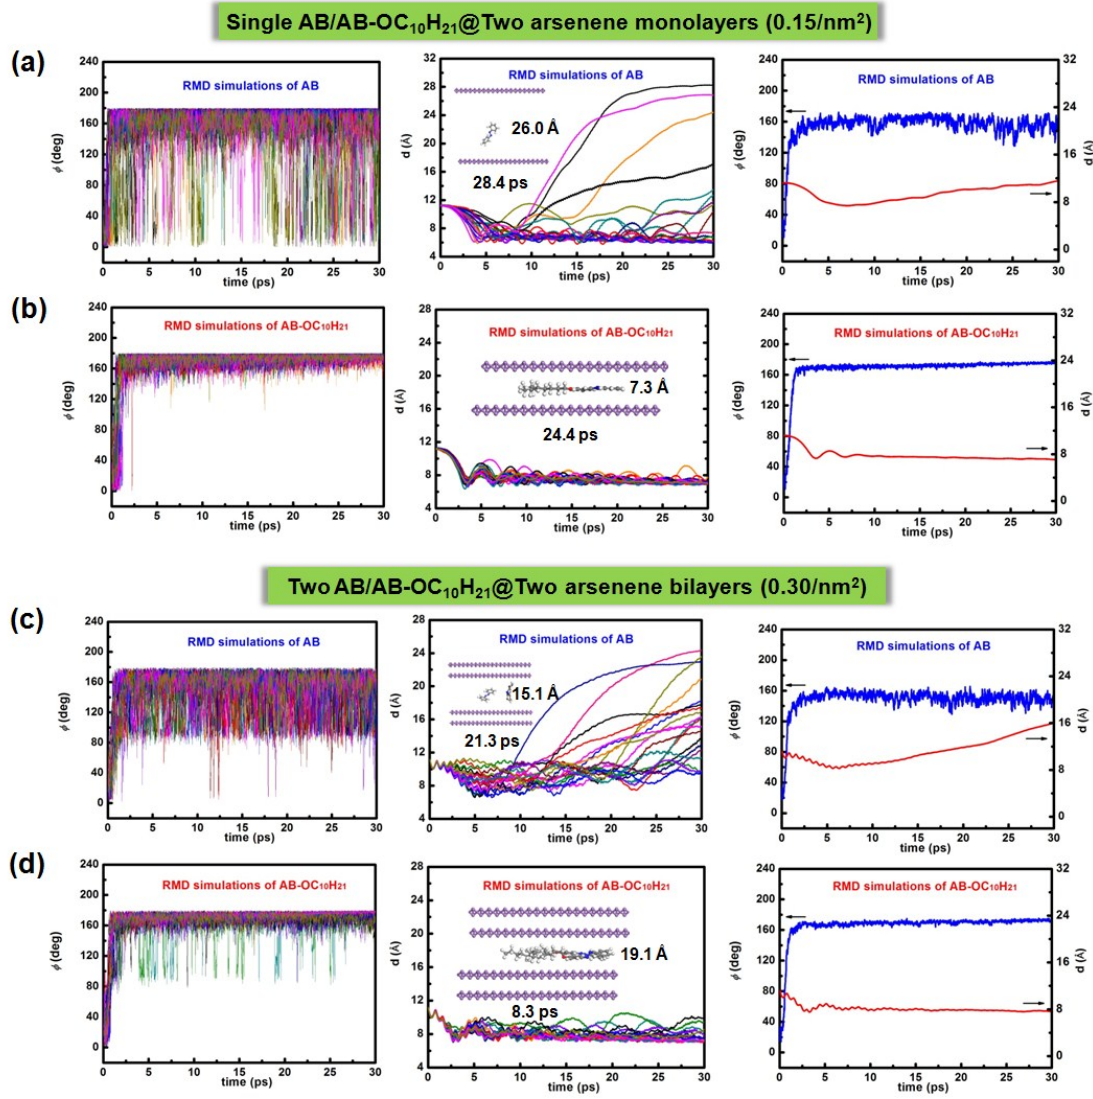

**Fig. S2** RMD simulation results of AB-based systems with different layers and coverage rates. The time evolutions of the dihedral angle,  $\phi$ , the interlayer distance,  $d$ , and the average dihedral angle along with interlayer distance distributions in twenty independent simulations for (a) single AB and (b) single AB-OC<sub>10</sub>H<sub>21</sub> between two arsenene monolayers; (c) two AB and (d) two AB-OC<sub>10</sub>H<sub>21</sub> between two arsenene bilayers. Insets in the figure denote the snapshots at different time steps.
